# Supplementary material for: Improved assembly of noisy long reads by k-mer validation
Source: PubMed Central journal article supplement — Genome Res. 2016 Dec;26(12):1710–20. doi: 10.1101/gr.209247.116 (PMC5131822; doi:10.1101/gr.209247.116), 2016-12
Supplement: supp_gr.209247.116_Supplemental_Fig_S1.pdf [file supp_gr.209247.116_Supplemental_Fig_S1.pdf]

Supplemental Fig. S1

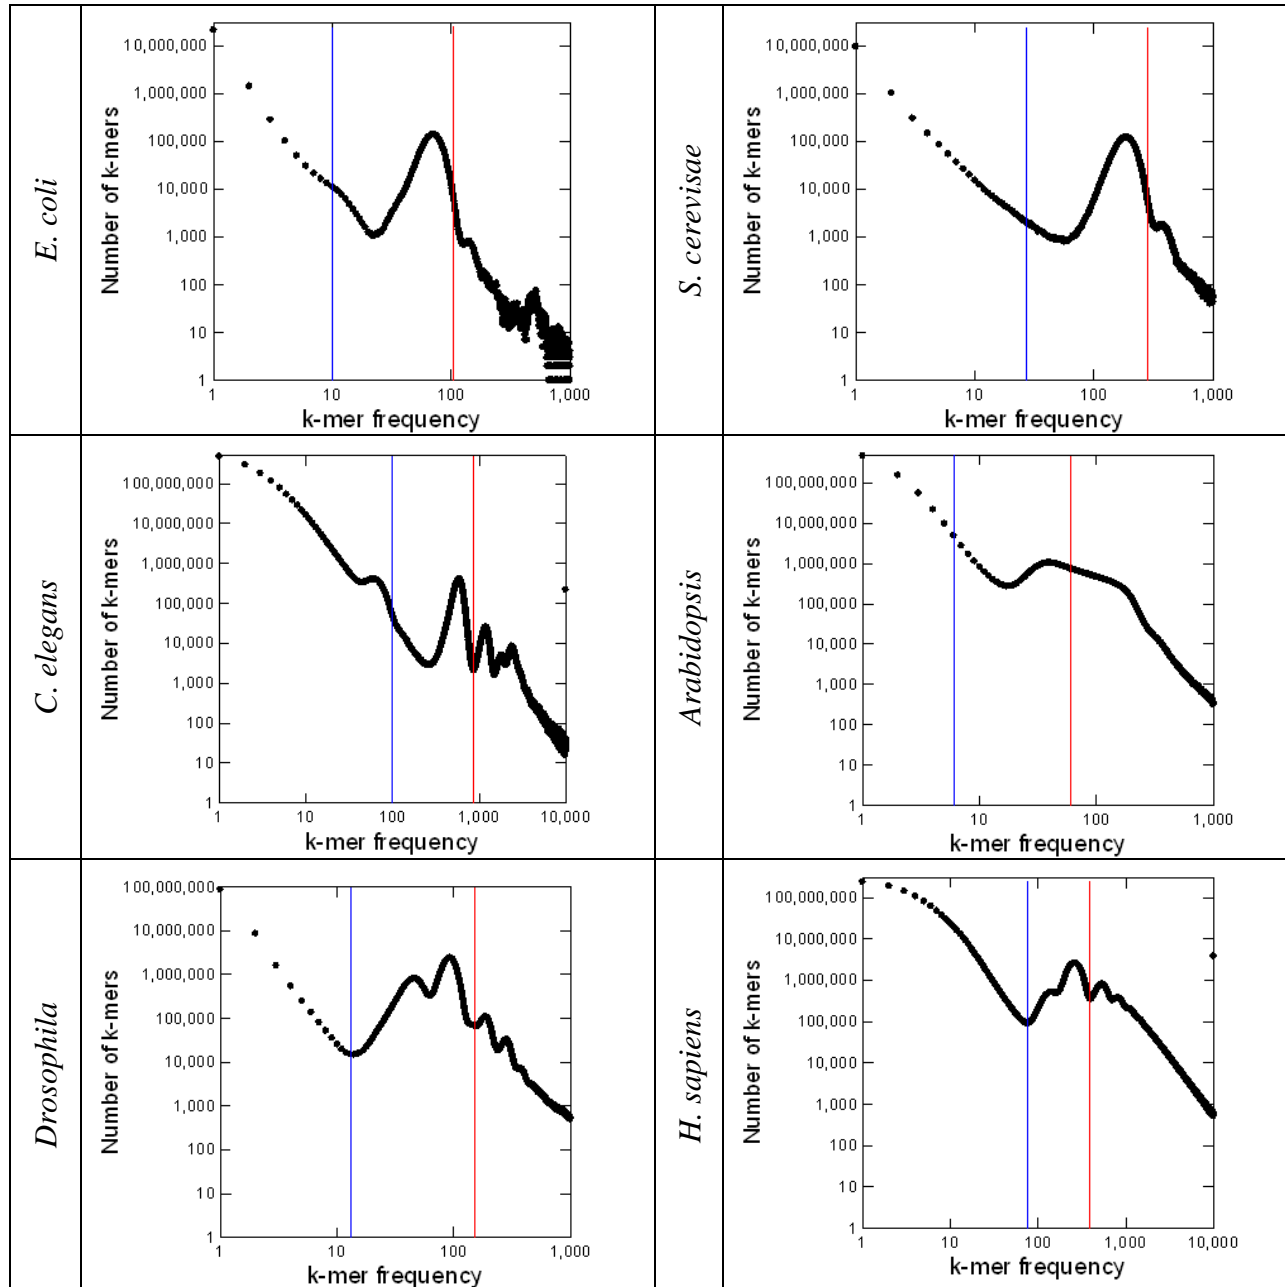

Supplemental Figure S1. Illumina  $k$ -mer frequency cut-offs. The blue line is the low-frequency cut-off, intended to remove error  $k$ -mers. The red line is the high-frequency cut-off, intended to remove  $k$ -mers that have more than one copy in the genome. Actual values are shown in Supplemental Table S2. In the *Drosophila* and *H.sapiens* data, the first peak is the X and Y single-copy  $k$ -mers, and the second peak is the autosomal ones (Supplemental Fig. S5).
