# Supplementary material for: Improved assembly of noisy long reads by k-mer validation
Source: PubMed Central journal article supplement — Genome Res. 2016 Dec;26(12):1710–20. doi: 10.1101/gr.209247.116 (PMC5131822; doi:10.1101/gr.209247.116), 2016-12
Supplement: supp_gr.209247.116_Supplemental_Fig_S2.pdf [file supp_gr.209247.116_Supplemental_Fig_S2.pdf]

Supplemental Fig. S2

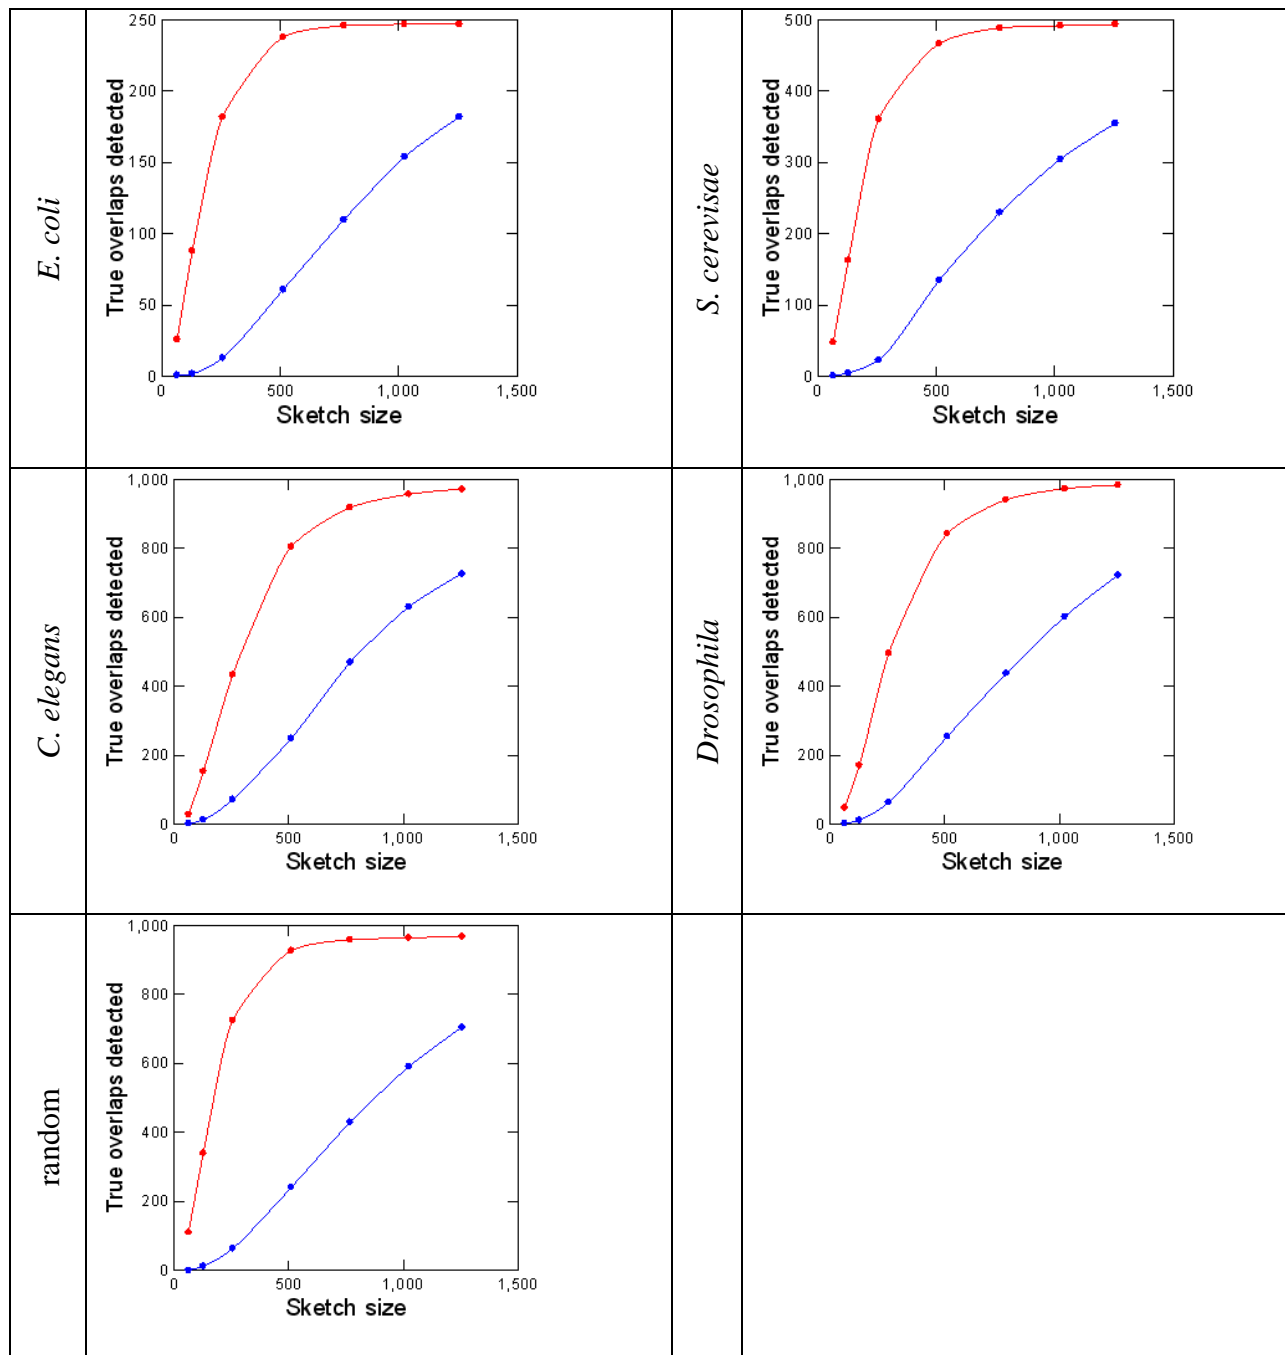

Supplemental Figure S2. Sensitivity of read overlap detection. PacBio reads (pairs of 10 kb sequences with 2kb overlaps) were simulated with sequences from different sources, and were subjected to standard MHAP (blue) or MHAP with masking of low-frequency  $k$ -mers (red) for overlap detection. The valid  $k$ -mer list came from Illumina reads (Supplemental Table S2). The number of pairs are 250 for *E. coli*, 500 for yeast, and 1000 for the others.
