# Supplementary material for: Improved assembly of noisy long reads by k-mer validation
Source: PubMed Central journal article supplement — Genome Res. 2016 Dec;26(12):1710–20. doi: 10.1101/gr.209247.116 (PMC5131822; doi:10.1101/gr.209247.116), 2016-12
Supplement: supp_gr.209247.116_Supplemental_Fig_S3.pdf [file supp_gr.209247.116_Supplemental_Fig_S3.pdf]

Supplemental Fig. S3

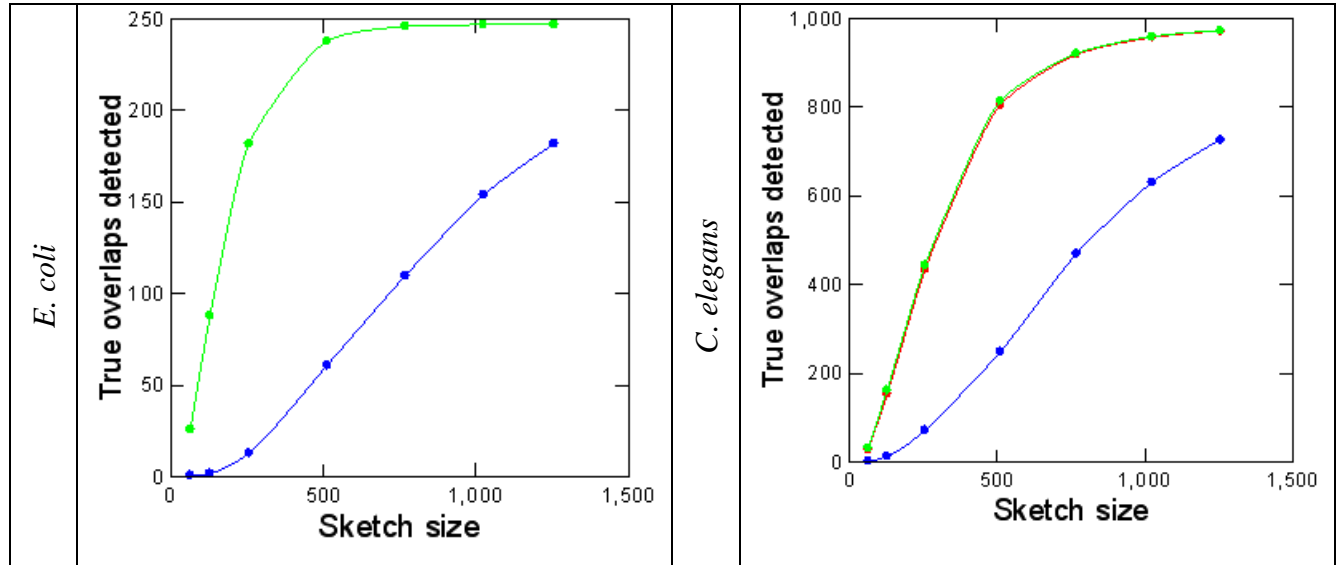

Supplemental Figure S3. Sensitivity of read overlap detection, using the genome-derived list of valid *k*-mers. PacBio reads (pairs of 10 kb sequences with 2kb overlaps) were simulated from the *E. coli* genome (left panel; 250 pairs of reads) or the *C. elegans* genome (right panel; 1000 pairs of reads), and were subjected to standard MHAP (blue), MHAP with masking of low-frequency *k*-mers from Illumina-derived list (red), or MHAP with masking of genome-derived non single-copy *k*-mers (green). Note that the results with Illumina derived (red) and genome-derived (green) list of valid *k*-mers were essentially identical; only the genome-derived (green) is visible in the left graph.
