# Supplementary material for: Improved assembly of noisy long reads by k-mer validation
Source: PubMed Central journal article supplement — Genome Res. 2016 Dec;26(12):1710–20. doi: 10.1101/gr.209247.116 (PMC5131822; doi:10.1101/gr.209247.116), 2016-12
Supplement: supp_gr.209247.116_Supplemental_Fig_S7.pdf [file supp_gr.209247.116_Supplemental_Fig_S7.pdf]

Supplemental Fig. S7

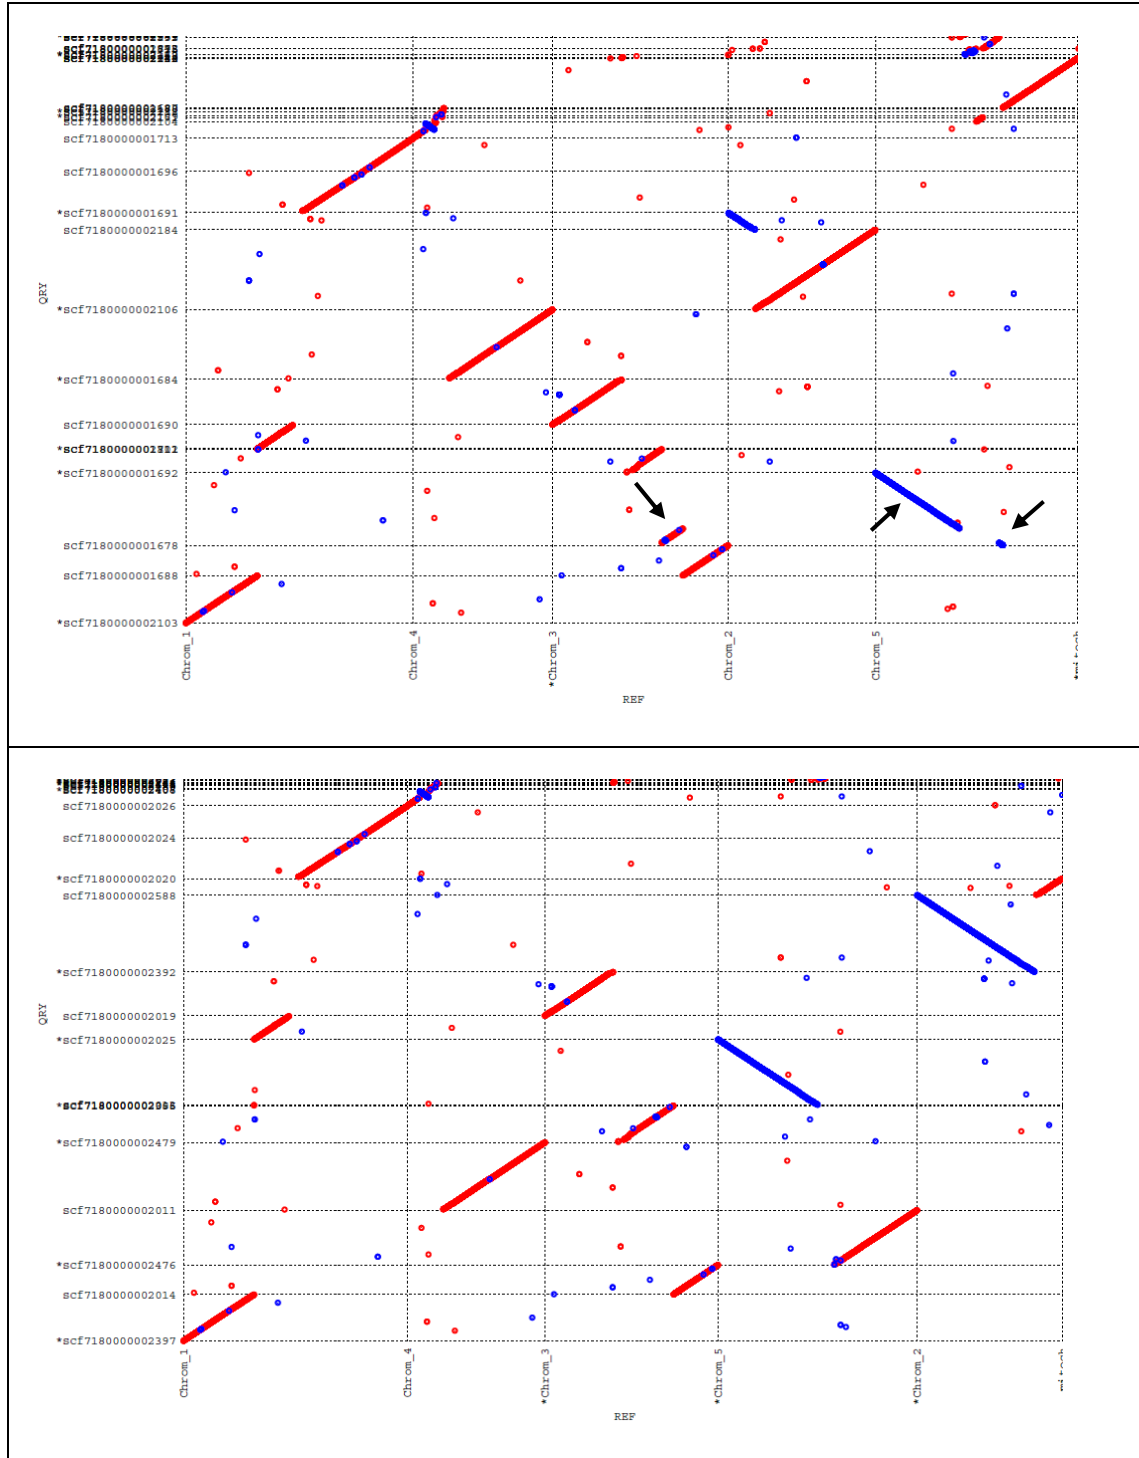

Supplemental Figure S7. Gross misassemblies related to the MHAP memory parameter (ovlMemory). The same *Arabidopsis* PacBio reads were assembled with the standard MHAP using ovlMemory=56Gb (top) or ovlMemory=96Gb (bottom; these are respectively assemblies #9 and #10 of Supplemental Table S13). The assemblies were then checked with *mummerplot* (Kurtz et al. 2004) for the presence of gross

misassemblies. The black arrows in the 56Gb assembly (top) point to one such case: contig scf7180000001678 spuriously joined sequences from chromosomes 3 and 5. Note that this misassembly did not occur in the 96Gb assembly (bottom). Similar misassemblies are present in 56Gb assemblies and absent in 96 Gb assemblies using L and LH  $k$ -mer validation (not shown). For the sake of clarity we removed the small contigs from the figures.
