# Supplementary material for: Improved assembly of noisy long reads by k-mer validation
Source: PubMed Central journal article supplement — Genome Res. 2016 Dec;26(12):1710–20. doi: 10.1101/gr.209247.116 (PMC5131822; doi:10.1101/gr.209247.116), 2016-12
Supplement: supp_gr.209247.116_Supplemental_Fig_S11.pdf [file supp_gr.209247.116_Supplemental_Fig_S11.pdf]

Supplemental Fig. S11

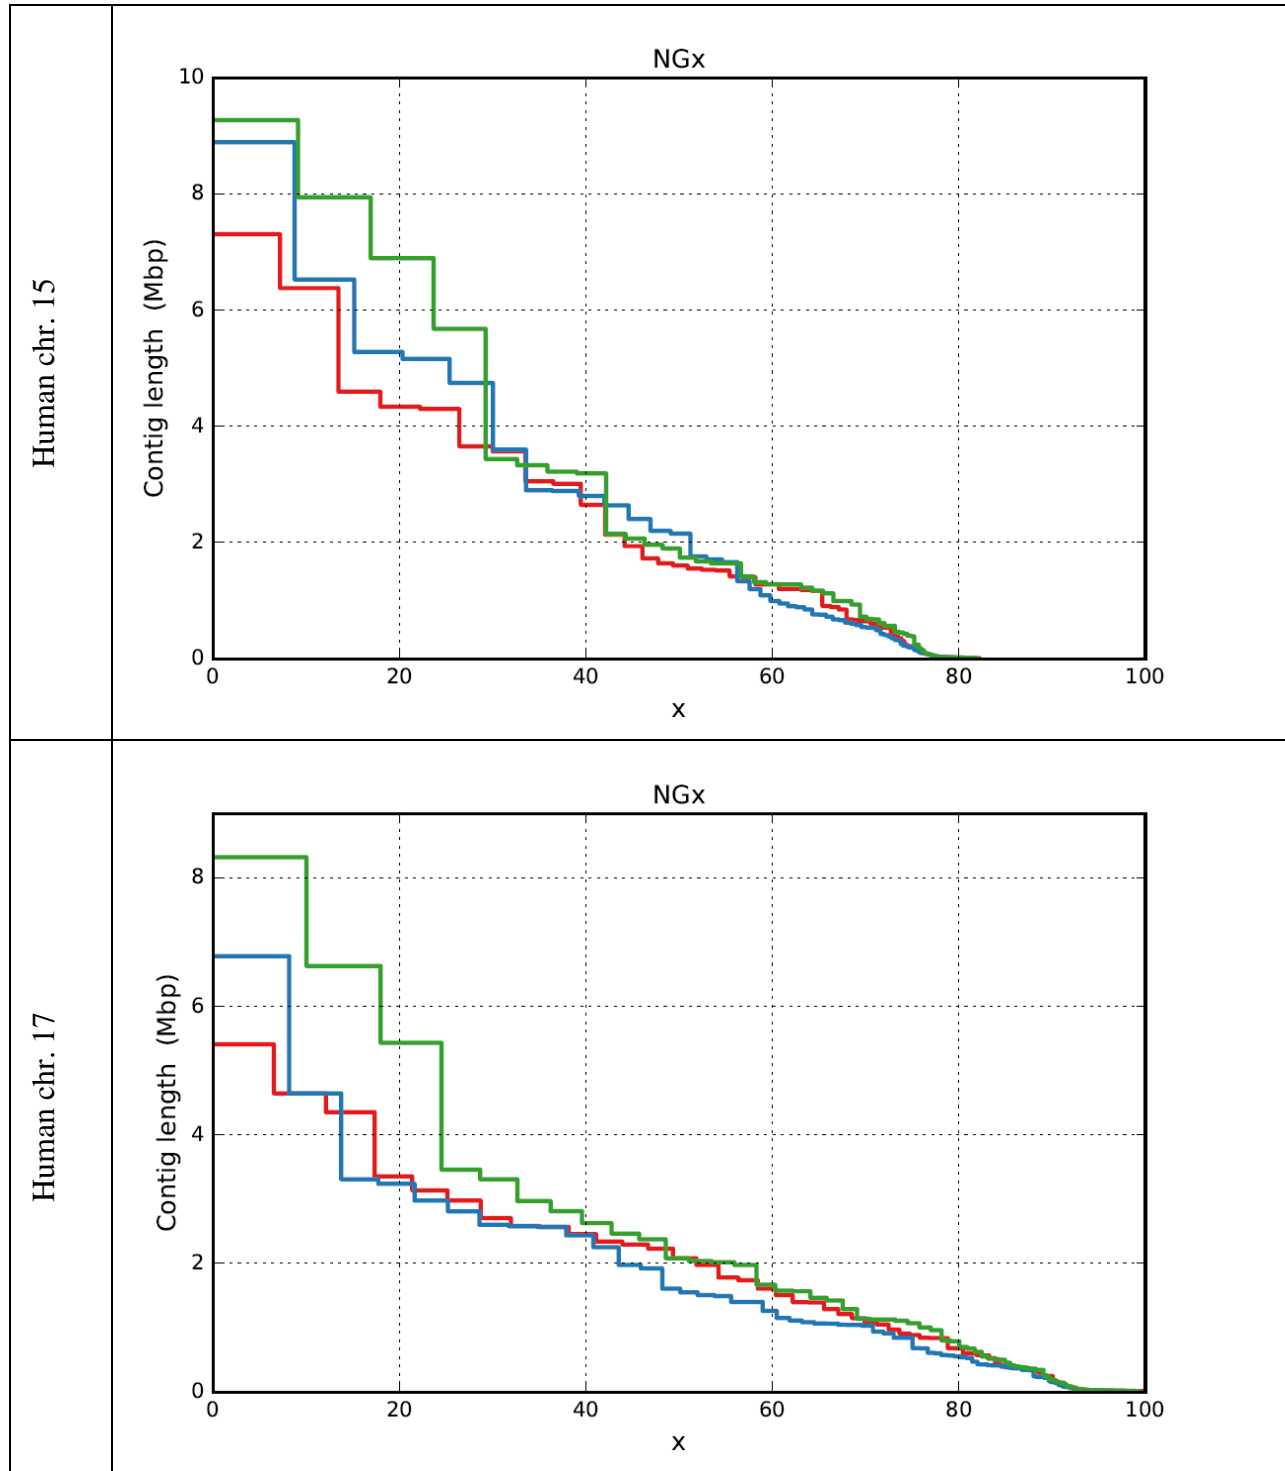

Supplemental Figure S11. Assembly contiguity as shown in NGx plots (human chromosomes 15 and 17). Standard MHAP assembly is shown in red, L-masking in blue and LH-masking in green. Note that  $k$ -mer validation with LH masking assemblies have higher NGx throughout most of the range, in both chromosomes.
