# Supplementary material for: Improved assembly of noisy long reads by k-mer validation
Source: PubMed Central journal article supplement — Genome Res. 2016 Dec;26(12):1710–20. doi: 10.1101/gr.209247.116 (PMC5131822; doi:10.1101/gr.209247.116), 2016-12
Supplement: supp_gr.209247.116_Supplemental_Fig_S12.pdf [file supp_gr.209247.116_Supplemental_Fig_S12.pdf]

Supplemental Fig. S12

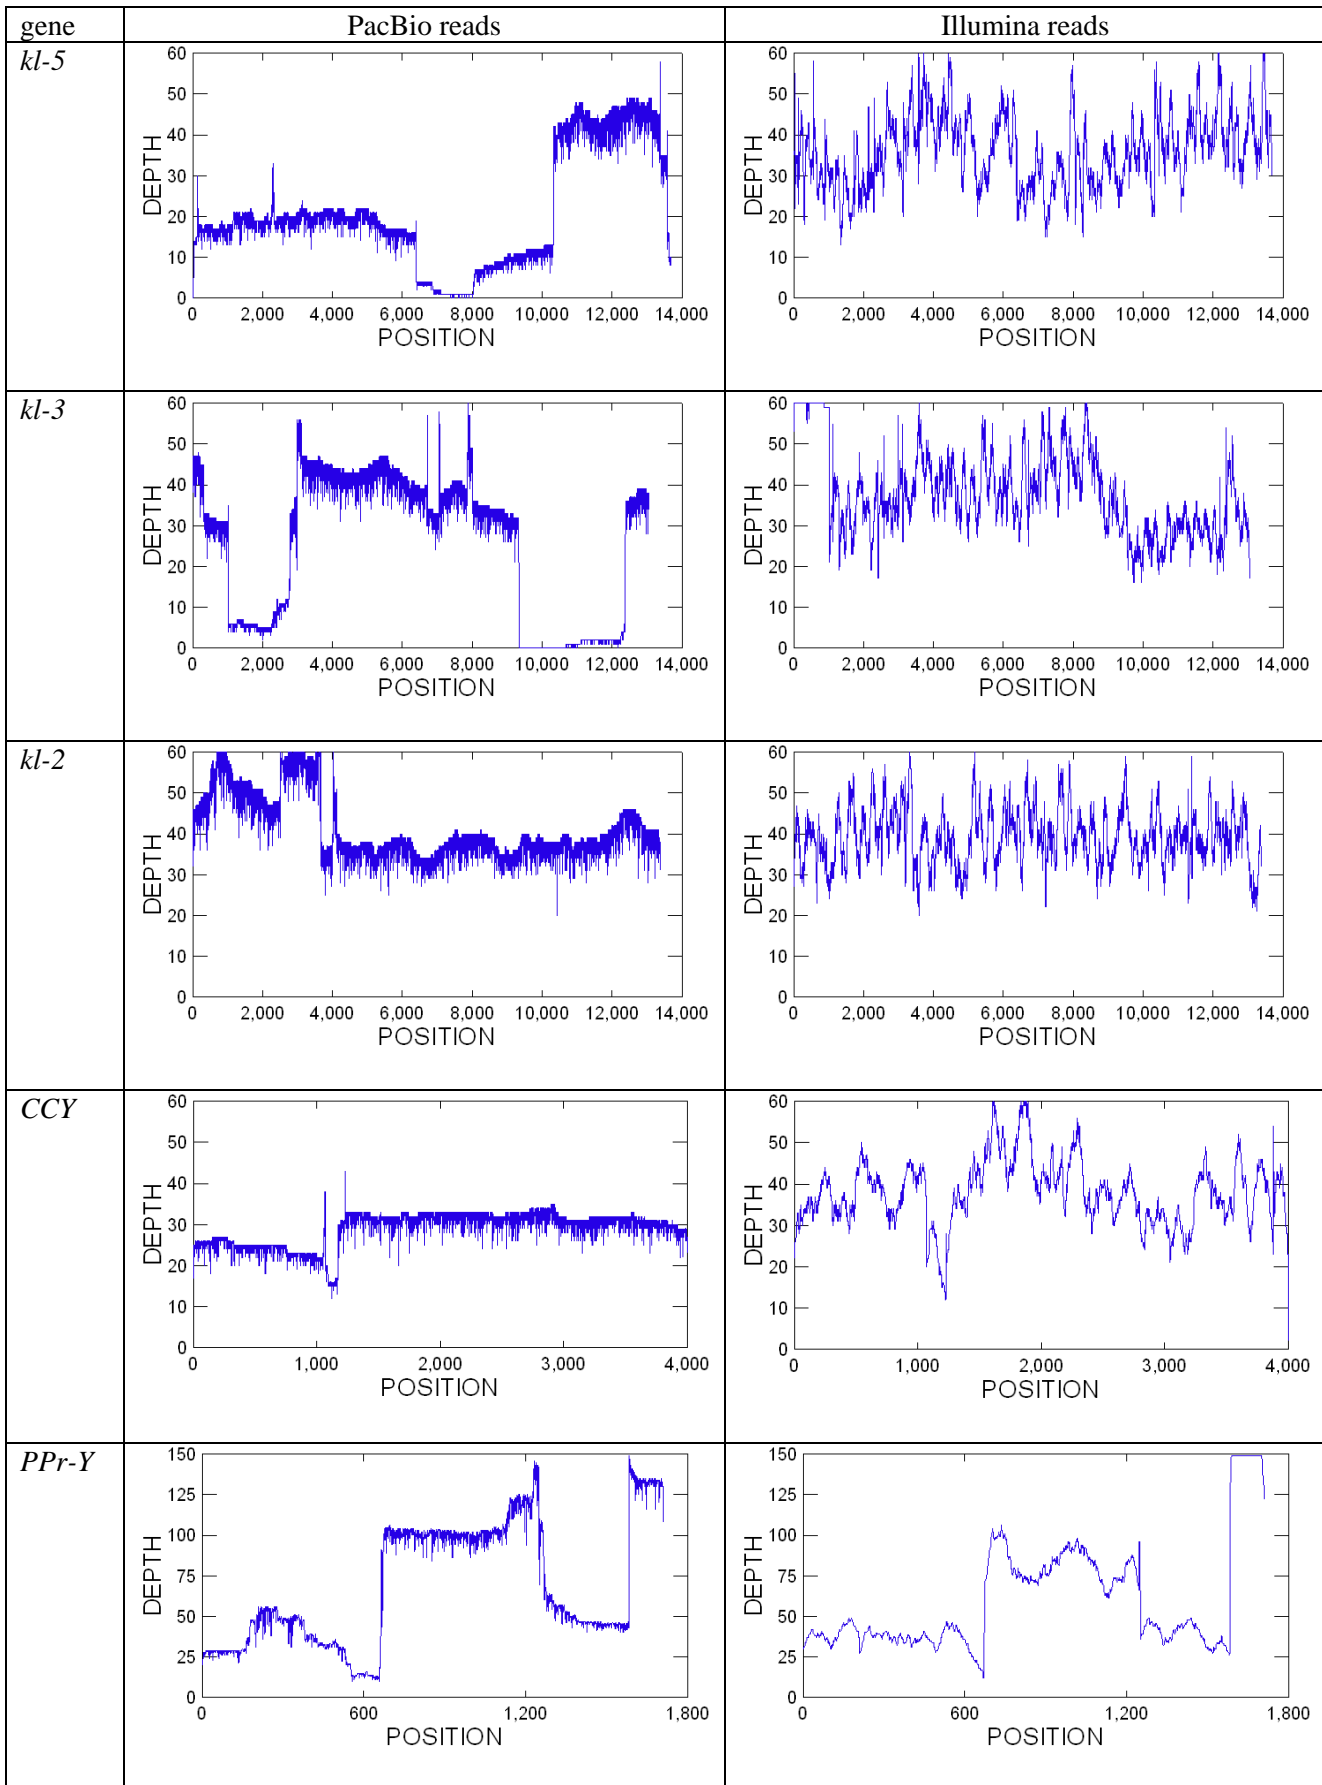

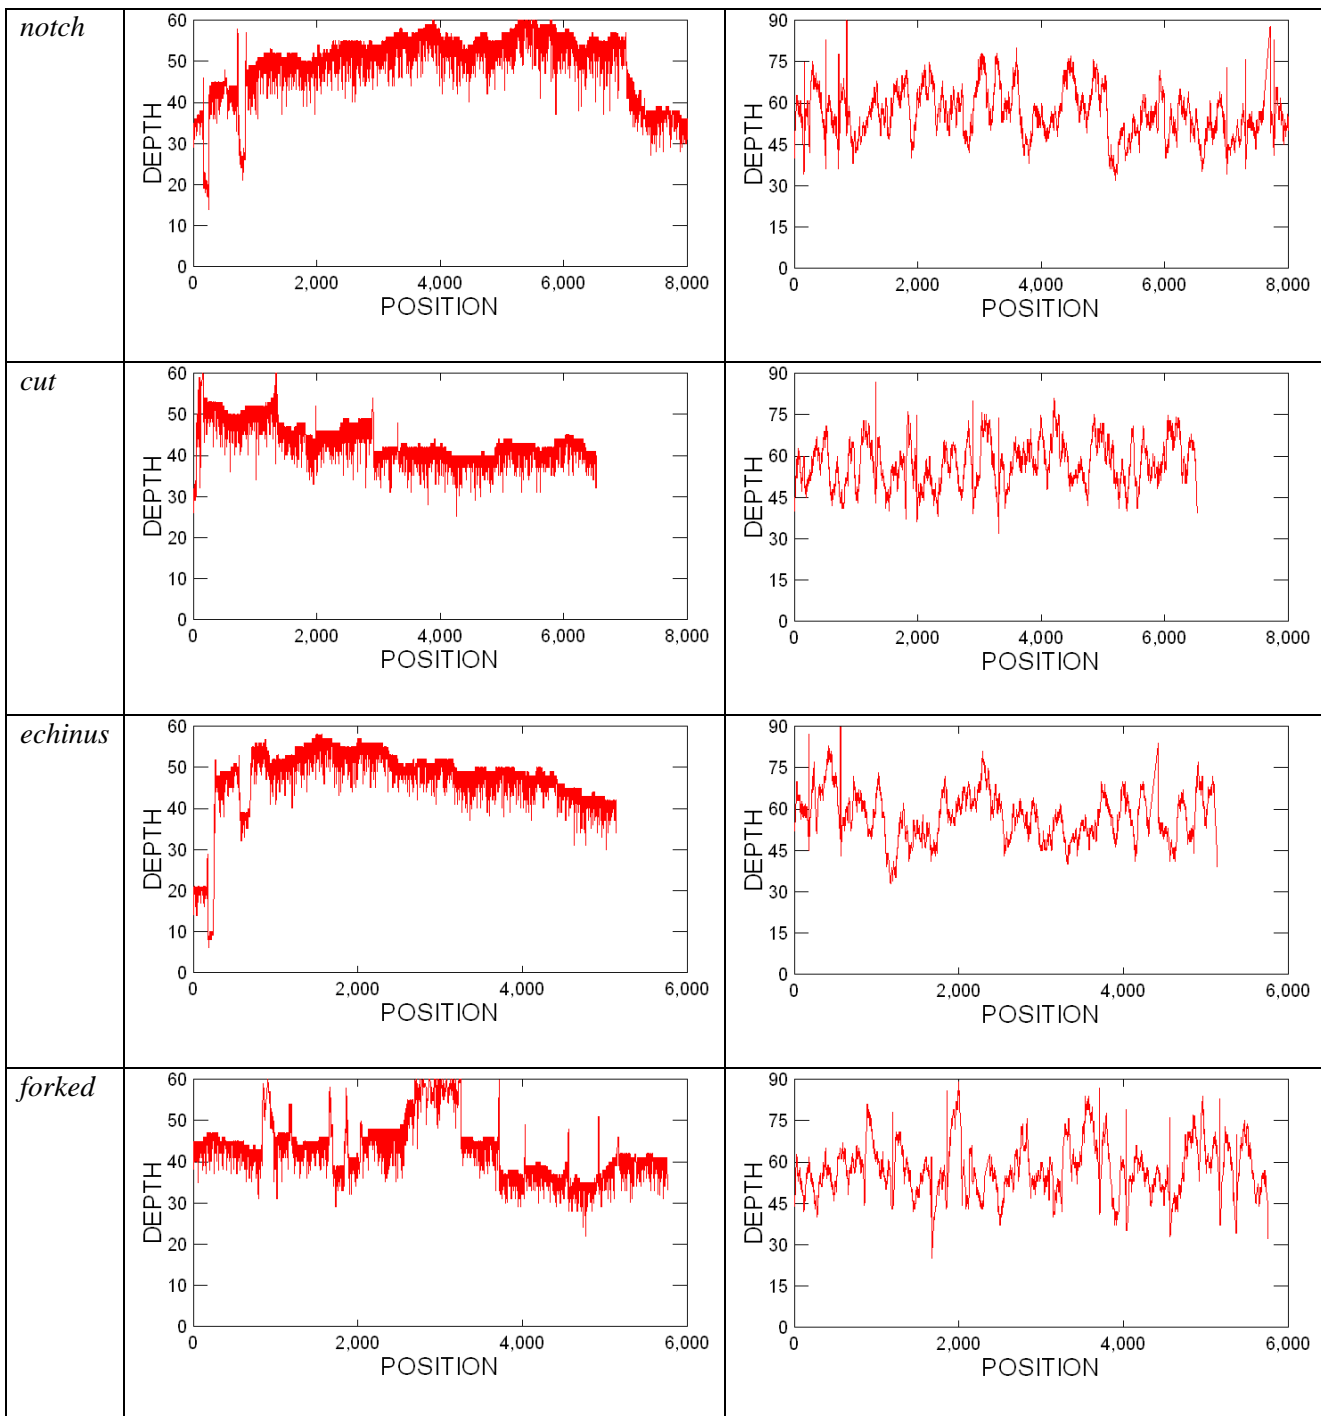

Supplemental Figure S12. Sequencing coverage for single copy Y-linked and X-linked genes. Left: PacBio reads. Right: Illumina reads. Reads were aligned with bwa to the coding sequence (CDS) of Y-linked (blue) or X-linked (red) *Drosophila* genes. Note that PacBio coverage is very low or zero in several regions of Y-linked genes, which never occurs with X-linked genes. Note also that Illumina coverage is fairly constant across all genes (except for exon duplications in the *PPr-Y* gene, and possibly in a few other Y-linked genes). The expected coverage is  $\sim 45x$  for both X-linked and Y-linked genes (reads came from males).
