# Supplementary material for: Improved assembly of noisy long reads by k-mer validation
Source: PubMed Central journal article supplement — Genome Res. 2016 Dec;26(12):1710–20. doi: 10.1101/gr.209247.116 (PMC5131822; doi:10.1101/gr.209247.116), 2016-12
Supplement: supp_gr.209247.116_Supplemental_Fig_S13.pdf [file supp_gr.209247.116_Supplemental_Fig_S13.pdf]

Supplemental Fig. S13

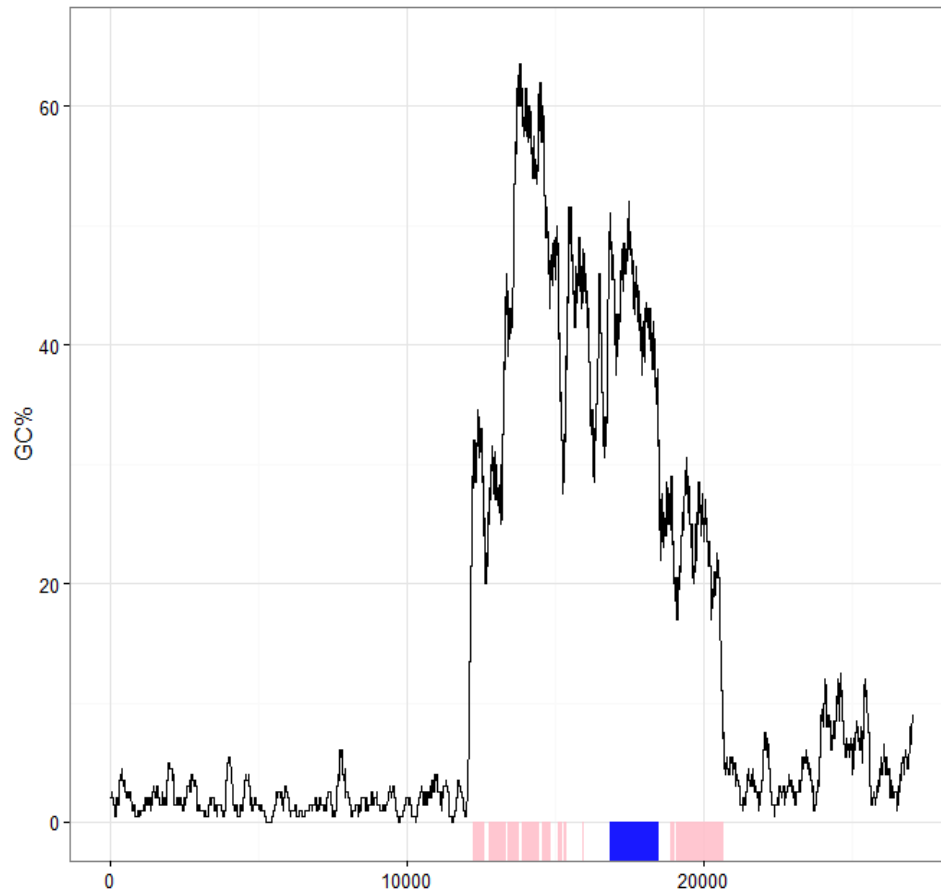

Supplemental Figure S13. GC-content of the *kl-5* gene of *D. melanogaster* in the exon 13 and flanking introns. This exon failed to be assembled with PacBio reads; the data came from manual assembly of the two reads that cover it and also part of the two flanking introns. The bottom of the graph shows the position of the exon (blue), and transposable elements (pink). Note that outside this central region there is almost pure AT sequence.
