# Supplementary material for: Improved assembly of noisy long reads by k-mer validation
Source: PubMed Central journal article supplement — Genome Res. 2016 Dec;26(12):1710–20. doi: 10.1101/gr.209247.116 (PMC5131822; doi:10.1101/gr.209247.116), 2016-12
Supplement: supp_gr.209247.116_Supplemental_Table_S1.pdf [file supp_gr.209247.116_Supplemental_Table_S1.pdf]

Supplemental Table S1 *k*-mer analysis of PacBio reads.

| PacBio dataset       | Genome size (Mb) | Coverage* | Reference <i>k</i> -mer list† | Total <i>k</i> -mers |            |             |           | Distinct <i>k</i> -mers |           |            |         |
|----------------------|------------------|-----------|-------------------------------|----------------------|------------|-------------|-----------|-------------------------|-----------|------------|---------|
|                      |                  |           |                               | N                    | Valid      | Not valid   | % valid ‡ | N                       | Valid     | Not valid  | % valid |
| <i>E. coli</i>       | 4.64             | 94        | genome                        | 435753159            | 66902393   | 368850766   | 15.35     | 292687635               | 4513248   | 288174387  | 1.54    |
| <i>E. coli</i>       | 4.64             | 94        | Illumina                      | 435753159            | 67632607   | 368120552   | 15.52     | 292687635               | 4545559   | 288142076  | 1.55    |
| <i>S. cerevisiae</i> | 12.1             | 116       | Illumina                      | 1399080968           | 236336855  | 1162744113  | 16.89     | 656283404               | 11312654  | 644970750  | 1.72    |
| <i>C. elegans</i>    | 103              | 79        | genome                        | 8106551865           | 3027061318 | 5079490547  | 37.34     | 1453998486              | 73682446  | 1380316040 | 5.07    |
| <i>C. elegans</i>    | 103              | 79        | Illumina                      | 8106551865           | 3111708811 | 4994843054  | 38.39     | 1453998486              | 79509922  | 1374488564 | 5.47    |
| <i>Arabidopsis</i>   | 135              | 137       | Illumina                      | 18488719952          | 6596898991 | 11891820961 | 35.68     | 1838858368              | 108591962 | 1730266406 | 5.91    |
| <i>Drosophila</i>    | 180              | 87        | Illumina                      | 15718720226          | 4796884965 | 10921835261 | 30.52     | 1930342727              | 107187632 | 1823155095 | 5.55    |
| Random sequence      | 100              | 100       | synthetic genome              | 11091044996          | 1421548773 | 9669496223  | 12.82     | 2123282004              | 97708253  | 2025573751 | 4.60    |

\* Coverage estimated with jellyfish (Marçais and Kingsford 2011) as total *k*-mers / genome size

† Source of the valid *k*-mer list. "genome" means all *k*-mers from the finished genome is used; "Illumina", *k*-mers from Illumina reads filtered from low-frequency *k*-mers; "synthetic genome", all *k*-mers from the random sequence used to generate the synthetic PacBio reads.

‡ Repeat-rich genomes have a higher proportion of correct *k*-mers possibly because errors in repetitive sequences have a rather high chance of generating a valid *k*-mer that occurs in a variant copy of the repeat (located elsewhere in the genome).
