# Supplementary material for: Improved assembly of noisy long reads by k-mer validation
Source: PubMed Central journal article supplement — Genome Res. 2016 Dec;26(12):1710–20. doi: 10.1101/gr.209247.116 (PMC5131822; doi:10.1101/gr.209247.116), 2016-12
Supplement: supp_gr.209247.116_Supplemental_Table_S2.pdf [file supp_gr.209247.116_Supplemental_Table_S2.pdf]

Supplemental Table S2. Illumina *k*-mer frequency cut-offs used to produce the valid *k*-mer lists.

| Organism             | Strain                                    | Genome size (Mbp) | Quality cut-off | Illumina raw coverage * | Illumina net coverage†      | Low freq. cut-off ‡ | High freq. cut-off § |
|----------------------|-------------------------------------------|-------------------|-----------------|-------------------------|-----------------------------|---------------------|----------------------|
| <i>E. coli</i>       | K-12 MG1655                               | 4.64              | Q0              | 77                      | 70                          | 10                  | 105                  |
| <i>S. cerevisiae</i> | W303                                      | 12.1              | Q20             | 232                     | 189                         | 27                  | 280                  |
| <i>C. elegans</i>    | Bristol N2                                | 103               | Q20             | 800                     | 586                         | 100                 | 863                  |
| <i>Drosophila</i>    | ISO1                                      | 180               | Q10             | 77 ¶                    | 46 (XY)<br>93 (autosomes)   | 13                  | 150                  |
| <i>Arabidopsis</i>   | Ler-0 (PacBio)<br>Ler-1, Ler-0 (Illumina) | 135               | Q0              | 106                     | 40                          | 6                   | 60                   |
| <i>H. sapiens</i>    | GIAB HG002                                | 3,000             | Q0              | 278                     | 144 (XY)<br>262 (autosomes) | 76                  | 393                  |

\* Calculated as Total *k*-mers / genome size. This value is larger than the net coverage because it includes the error *k*-mers. The accession numbers of the reads are in Supplemental Table S12.

† Calculated as peak of single-copy *k*-mer freq. *Drosophila* and human data came from the heterogametic sex, and in these cases the sex chromosomes form a separate peak, with half of the autosomal coverage.

‡ Intended to remove error *k*-mers. Set to approximately one seventh of the net coverage (single-copy peak)

§ Intended to remove *k*-mers with more than one copy in the genome. Set to approximately 1.5 fold the net coverage (single-copy peak).

¶ This value is the composite of two distributions: autosomes and sex-chromosomes (see Supplemental Fig. S5).
