# Supplementary material for: Improved assembly of noisy long reads by k-mer validation
Source: PubMed Central journal article supplement — Genome Res. 2016 Dec;26(12):1710–20. doi: 10.1101/gr.209247.116 (PMC5131822; doi:10.1101/gr.209247.116), 2016-12
Supplement: supp_gr.209247.116_Supplemental_Table_S3.pdf [file supp_gr.209247.116_Supplemental_Table_S3.pdf]

Supplemental Table S3. Read error correction: Illumina-derived versus genome-derived list of valid  $k$ -mers. All values are 95% trimmed means (to remove outliers).

| Organism          | Number of reads* | Method† | Valid $k$ -mer source                     | Total $k$ -mers | Correct $k$ -mers | % correct |
|-------------------|------------------|---------|-------------------------------------------|-----------------|-------------------|-----------|
| <i>E. coli</i>    | 7,410            | M       | -                                         | 15,045.3        | 14,242.0          | 94.66     |
| <i>E. coli</i>    | 7,410            | L       | Illumina (low frequency removed)          | 15,118.2        | 14,467.1          | 95.69     |
| <i>E. coli</i>    | 7,410            | L       | genome (all $k$ -mers)                    | 15,118.2        | 14,467.1          | 95.69     |
| <i>E. coli</i>    | 7,410            | LH      | Illumina (low and high frequency removed) | 15,119.0        | 14,469.3          | 95.70     |
| <i>E. coli</i>    | 7,410            | LH      | genome (single-copy $k$ -mers)            | 15,119.0        | 14,469.4          | 95.70     |
| <i>C. elegans</i> | 128,710          | M       | -                                         | 18,699.7        | 17,391.2          | 93.03     |
| <i>C. elegans</i> | 128,710          | L       | Illumina (low frequency removed)          | 18,805.5        | 17,563.3          | 93.44     |
| <i>C. elegans</i> | 128,710          | L       | genome (all $k$ -mers)                    | 18,806.3        | 17,565.0          | 93.50     |
| <i>C. elegans</i> | 128,710          | LH      | Illumina (low and high frequency removed) | 18,804.8        | 17,575.7          | 93.52     |
| <i>C. elegans</i> | 128,710          | LH      | genome (single-copy $k$ -mers)            | 18,805.3        | 17,575.4          | 93.52     |

\* Exactly the same reads were compared across the five combinations of method and valid  $k$ -mer source.

† "M", standard MHAP; "L", MHAP with low-frequency  $k$ -mer masking; "LH", MHAP with low and high frequency  $k$ -mer masking.
