# Supplementary material for: Improved assembly of noisy long reads by k-mer validation
Source: PubMed Central journal article supplement — Genome Res. 2016 Dec;26(12):1710–20. doi: 10.1101/gr.209247.116 (PMC5131822; doi:10.1101/gr.209247.116), 2016-12
Supplement: supp_gr.209247.116_Supplemental_Table_S4.pdf [file supp_gr.209247.116_Supplemental_Table_S4.pdf]

Supplemental Table S4. Assembly quality assessment (Quast; all assemblies)

| Assembly*      | Comment      | Contig number | Largest contig | Total length | N50     | NG50     | N75     | NG75    | L50 | LG50 | L75 | LG75 | Misassemblies > 1kb † | Mismatches/100kb | Indels/100kb |
|----------------|--------------|---------------|----------------|--------------|---------|----------|---------|---------|-----|------|-----|------|-----------------------|------------------|--------------|
| ecoli_M_30x    | low coverage | 26            | 916042         | 4577644      | 356518  | 356518   | 155650  | 155650  | 5   | 5    | 10  | 10   | 3                     | 2.72             | 139.79       |
| ecoli_L_30x    | low coverage | 11            | 1363117        | 4588137      | 969401  | 969401   | 358060  | 358060  | 2   | 2    | 5   | 5    | 3                     | 1.50             | 107.10       |
| ecoli_LH_30x   | low coverage | 13            | 1366089        | 4611905      | 969380  | 969380   | 358054  | 358054  | 2   | 2    | 5   | 5    | 3                     | 1.70             | 112.37       |
| yeast_M_128    | small sketch | 91            | 983833         | 12461105     | 457297  | 457297   | 213780  | 237877  | 10  | 10   | 20  | 19   | 123                   | 76.94            | 58.05        |
| yeast_L_128    | small sketch | 43            | 1537479        | 12579864     | 745960  | 777025   | 446753  | 455202  | 7   | 6    | 12  | 11   | 126                   | 82.75            | 31.19        |
| yeast_LH_128   | small sketch | 37            | 1530874        | 12487180     | 751107  | 751107   | 572465  | 572465  | 7   | 7    | 11  | 11   | 122                   | 83.50            | 27.63        |
| ecoli_M        |              | 2             | 4654122        | 4685061      | 4654122 | 4654122  | 4654122 | 4654122 | 1   | 1    | 1   | 1    | 5                     | 0.09             | 14.02        |
| ecoli_L        |              | 2             | 4654191        | 4685139      | 4654191 | 4654191  | 4654191 | 4654191 | 1   | 1    | 1   | 1    | 5                     | 0.35             | 14.26        |
| ecoli_LH       |              | 2             | 4654137        | 4685085      | 4654137 | 4654137  | 4654137 | 4654137 | 1   | 1    | 1   | 1    | 5                     | 0.22             | 13.72        |
| yeast_M        |              | 39            | 1533267        | 12569074     | 818055  | 818055   | 457460  | 600310  | 6   | 6    | 11  | 10   | 130                   | 80.73            | 28.99        |
| yeast_L        |              | 36            | 1537666        | 12460414     | 678320  | 750938   | 446799  | 468828  | 7   | 6    | 12  | 11   | 123                   | 81.07            | 29.89        |
| yeast_LH       |              | 41            | 1530583        | 12644445     | 818185  | 818185   | 462140  | 468595  | 6   | 6    | 11  | 10   | 125                   | 86.08            | 26.30        |
| yeast_M_p      | pbdagcon     | 45            | 1530555        | 12599740     | 815596  | 815596   | 474596  | 474596  | 6   | 6    | 11  | 11   | 130                   | 78.57            | 18.19        |
| yeast_L_p      | pbdagcon     | 37            | 1535936        | 12463610     | 815424  | 815424   | 582263  | 594116  | 6   | 6    | 11  | 10   | 128                   | 79.11            | 19.16        |
| yeast_LH_p     | pbdagcon     | 40            | 1537667        | 12538181     | 818104  | 818104   | 574548  | 602184  | 6   | 6    | 11  | 10   | 121                   | 77.59            | 17.36        |
| cel_M          |              | 153           | 5285091        | 104406335    | 2119841 | 2220855  | 1332283 | 1392101 | 17  | 16   | 31  | 29   | 1749                  | 15.64            | 46.44        |
| cel_L          |              | 153           | 4763590        | 104240890    | 1967842 | 2031208  | 1188901 | 1226313 | 17  | 16   | 33  | 31   | 1546                  | 14.40            | 46.53        |
| cel_LH         |              | 108           | 7255918        | 103011904    | 2689323 | 2838280  | 1232606 | 1549290 | 13  | 12   | 26  | 24   | 1649                  | 15.26            | 47.12        |
| ara_M          |              | 727           | 15819004       | 134469351    | 9063257 | 9587932  | 6095039 | 6717465 | 6   | 5    | 10  | 9    | 6019‡                 | 600.43‡          | 162.15‡      |
| ara_L          |              | 620           | 17168897       | 133073544    | 8753656 | 8919426  | 4697047 | 6094458 | 6   | 5    | 11  | 9    | 5880‡                 | 598.11‡          | 164.15‡      |
| ara_LH         |              | 633           | 18788518       | 133270108    | 9610620 | 13499602 | 6095028 | 6717020 | 5   | 4    | 9   | 8    | 5767‡                 | 602.62‡          | 168.38‡      |
| dros_M         |              | 1072          | 21678627       | 169543188    | 4879969 | 7157936  | 511201  | 1674008 | 7   | 5    | 38  | 15   | 11136                 | 14.57            | 93.37        |
| dros_L         |              | 963           | 18648553       | 167735167    | 5370285 | 7147503  | 550370  | 1849454 | 7   | 5    | 30  | 14   | 10278                 | 14.40            | 88.27        |
| dros_LH        |              | 1019          | 25756195       | 169542479    | 7911769 | 13654652 | 604262  | 2159549 | 5   | 4    | 27  | 10   | 11161                 | 14.60            | 110.28       |
| human_chr15_M  | sorted reads | 343           | 7309895        | 83890337     | 2647243 | 1602477  | 1201816 | 213215  | 10  | 15   | 23  | 45   | 78                    | 86.32            | 95.86        |
| human_chr15_L  | sorted reads | 330           | 8894105        | 83396444     | 2800843 | 2152643  | 947681  | 191831  | 9   | 13   | 21  | 48   | 73                    | 83.96            | 94.97        |
| human_chr15_LH | sorted reads | 322           | 9276182        | 83558937     | 3188709 | 1897981  | 1278137 | 385258  | 8   | 12   | 20  | 38   | 77                    | 82.60            | 90.37        |
| human_chr17_M  | sorted reads | 414           | 5412440        | 83732343     | 2081827 | 2081827  | 885562  | 885562  | 14  | 14   | 29  | 29   | 182                   | 73.84            | 103.51       |
| human_chr17_L  | sorted reads | 388           | 6783205        | 82743477     | 1606756 | 1606756  | 841796  | 841796  | 14  | 14   | 32  | 32   | 190                   | 72.78            | 104.28       |
| human_chr17_LH | sorted reads | 361           | 8323604        | 82720089     | 2081188 | 2081188  | 1070300 | 1070300 | 11  | 11   | 25  | 25   | 152                   | 67.11            | 96.96        |

\* "M", standard MHAP; "L", MHAP with low-frequency *k*-mer masking; "LH", MHAP with low and high frequency *k*-mer masking.

† As reported by Quast (Gurevich et al. 2013): misassemblies > 1kb, or joining different chromosomes. The large values in *Drosophila* probably were caused by the fragmentation of the reference sequence.

‡ The reported assembly errors in *Arabidopsis* are unreliable because the reference genome came from a different strain.
