# Supplementary material for: Improved assembly of noisy long reads by k-mer validation
Source: PubMed Central journal article supplement — Genome Res. 2016 Dec;26(12):1710–20. doi: 10.1101/gr.209247.116 (PMC5131822; doi:10.1101/gr.209247.116), 2016-12
Supplement: supp_gr.209247.116_Supplemental_Table_S5.pdf [file supp_gr.209247.116_Supplemental_Table_S5.pdf]

Supplemental Table S5. Assembly quality assessment: Illumina-derived versus genome-derived list of valid *k*-mers (Quast).

| Organism          | Method* | Valid <i>k</i> -mer source†               | Contig number | Largest contig | Total length | N50     | NG50    | N75     | NG75    | L50 | LG50 | L75 | LG75 | Misassemblies > 1kb | Mismatches/100kb | Indels/100kb |
|-------------------|---------|-------------------------------------------|---------------|----------------|--------------|---------|---------|---------|---------|-----|------|-----|------|---------------------|------------------|--------------|
| <i>C. elegans</i> | M       | -                                         | 153           | 5285091        | 104406335    | 2119841 | 2220855 | 1332283 | 1392101 | 17  | 16   | 31  | 29   | 1749                | 15.64            | 46.44        |
| <i>C. elegans</i> | L       | Illumina (low frequency removed)          | 153           | 4763590        | 104240890    | 1967842 | 2031208 | 1188901 | 1226313 | 17  | 16   | 33  | 31   | 1546                | 14.40            | 46.53        |
| <i>C. elegans</i> | L       | genome (all <i>k</i> -mers)               | 153           | 5266065        | 104190476    | 2118433 | 2435154 | 1447476 | 1499931 | 16  | 15   | 31  | 29   | 1661                | 15.93            | 46.77        |
| <i>C. elegans</i> | LH      | Illumina (low and high frequency removed) | 108           | 7255918        | 103011904    | 2689323 | 2838280 | 1232606 | 1549290 | 13  | 12   | 26  | 24   | 1649                | 15.26            | 47.12        |
| <i>C. elegans</i> | LH      | genome (single-copy <i>k</i> -mers)       | 159           | 4955962        | 104445248    | 2281043 | 2340439 | 1341813 | 1629514 | 17  | 16   | 31  | 28   | 1657                | 16.21            | 47.45        |
| <i>E. coli</i>    | M       | -                                         | 2             | 4654123        | 4685062      | 4654123 | 4654123 | 4654123 | 4654123 | 1   | 1    | 1   | 1    | 5                   | 0.09             | 14.02        |
| <i>E. coli</i>    | L       | Illumina (low frequency removed)          | 2             | 4654192        | 4685140      | 4654192 | 4654192 | 4654192 | 4654192 | 1   | 1    | 1   | 1    | 5                   | 0.35             | 14.28        |
| <i>E. coli</i>    | L       | genome (all <i>k</i> -mers)               | 2             | 4654189        | 4685137      | 4654189 | 4654189 | 4654189 | 4654189 | 1   | 1    | 1   | 1    | 5                   | 0.35             | 14.24        |
| <i>E. coli</i>    | LH      | Illumina (low and high frequency removed) | 2             | 4654133        | 4685081      | 4654133 | 4654133 | 4654133 | 4654133 | 1   | 1    | 1   | 1    | 5                   | 0.19             | 13.42        |
| <i>E. coli</i>    | LH      | genome (single-copy <i>k</i> -mers)       | 2             | 4654144        | 4685092      | 4654144 | 4654144 | 4654144 | 4654144 | 1   | 1    | 1   | 1    | 5                   | 0.32             | 13.44        |

\* "M", standard MHAP; "L", MHAP with low-frequency *k*-mer masking; "LH", MHAP with low and high frequency *k*-mer masking.

† Note that a genome-derived list of all *k*-mers is similar to an Illumina derived list with low frequency *k*-mers removed (both were called "L-masking" method here). Analogously, a genome-derived list of single-copy *k*-mers is similar to an Illumina derived list with low frequency and high-frequency *k*-mers removed (both were called "LH-masking" method).
