# Supplementary material for: Improved assembly of noisy long reads by k-mer validation
Source: PubMed Central journal article supplement — Genome Res. 2016 Dec;26(12):1710–20. doi: 10.1101/gr.209247.116 (PMC5131822; doi:10.1101/gr.209247.116), 2016-12
Supplement: supp_gr.209247.116_Supplemental_Table_S6.pdf [file supp_gr.209247.116_Supplemental_Table_S6.pdf]

Supplemental Table S6. Assembly in the presence of coverage bias of Illumina reads. Note that the tested coverage gap (zero coverage over 2kb) is harmless for LH *k*-mer validation assembly.

| Method* | Contig JSAF02032866 |                       |                   |
|---------|---------------------|-----------------------|-------------------|
|         | % sequence lost     | % sequence duplicated | Number of contigs |
| M       | 3.3                 | 10.0                  | 7                 |
| LH      | 2.4                 | 0                     | 1                 |
| LH bias | 2.4                 | 0                     | 1                 |

\* "M", standard MHAP; "LH", MHAP with low and high frequency *k*-mer masking, without bias in Illumina coverage bias; "LH bias", MHAP with low and high frequency *k*-mer masking, with full Illumina bias (zero coverage) across 2 kb.
