# Supplementary material for: Improved assembly of noisy long reads by k-mer validation
Source: PubMed Central journal article supplement — Genome Res. 2016 Dec;26(12):1710–20. doi: 10.1101/gr.209247.116 (PMC5131822; doi:10.1101/gr.209247.116), 2016-12
Supplement: supp_gr.209247.116_Supplemental_Table_S7.pdf [file supp_gr.209247.116_Supplemental_Table_S7.pdf]

Supplemental Table S7. Assembly of the "model genome" (human 10q11 segmental duplication) with the three methods.

| Method* | Both contigs    |              |                   | Left contig (401 kb) |              |                   | Right contig (201 kb) |              |                   |
|---------|-----------------|--------------|-------------------|----------------------|--------------|-------------------|-----------------------|--------------|-------------------|
|         | % sequence lost | % duplicated | Number of contigs | % sequence lost      | % duplicated | Number of contigs | % sequence lost       | % duplicated | Number of contigs |
| M       | 6.3             | 19.2         | 11                | 4.2                  | 15.0         | 6                 | 10.6                  | 27.7         | 5                 |
| L       | 3.3†            | 1.0          | 3                 | 2.5                  | 0            | 1                 | 4.9                   | 3.0          | 2                 |
| LH      | 3.7†            | 0            | 2                 | 2.4                  | 0            | 1                 | 6.3                   | 0            | 1                 |

\* "M", standard MHAP; "L", MHAP with low-frequency *k*-mer masking; "LH", MHAP with low and high frequency *k*-mer masking.

† Sequence lost is in the edges due to low coverage of the reads (this is an artifact caused by read simulation).
