# Supplementary material for: Improved assembly of noisy long reads by k-mer validation
Source: PubMed Central journal article supplement — Genome Res. 2016 Dec;26(12):1710–20. doi: 10.1101/gr.209247.116 (PMC5131822; doi:10.1101/gr.209247.116), 2016-12
Supplement: supp_gr.209247.116_Supplemental_Table_S8.pdf [file supp_gr.209247.116_Supplemental_Table_S8.pdf]

Supplemental Table S8. Assembly of two additional segmental duplications with the three methods. Each contig contains two segmental duplications in tandem.

| Method* | Both contigs    |              |                   | contig_GB1 (550 kb) |              |                   | contig_GB2 (380 kb) |              |                   |
|---------|-----------------|--------------|-------------------|---------------------|--------------|-------------------|---------------------|--------------|-------------------|
|         | % sequence lost | % duplicated | Number of contigs | % sequence lost     | % duplicated | Number of contigs | % sequence lost     | % duplicated | Number of contigs |
| M_2000  | 10.8            | 26.0         | 28                | 5.7                 | 29.0         | 17                | 18.2                | 21.7         | 11                |
| L_2000  | 4.3             | 23.4         | 25                | 2.2                 | 23.1         | 12                | 7.2                 | 23.7         | 13                |
| LH_2000 | 2.5             | 0.0          | 2                 | 2.2                 | 0.0          | 1                 | 3.0                 | 0.0          | 1                 |

\* All three assemblies used the `ovlMinLen` parameter equal to 2000 bp. "M\_2000", standard MHAP; "L\_2000", MHAP with low-frequency  $k$ -mer masking; "LH\_2000", MHAP with low and high frequency  $k$ -mer masking.
