# Supplementary material for: Improved assembly of noisy long reads by k-mer validation
Source: PubMed Central journal article supplement — Genome Res. 2016 Dec;26(12):1710–20. doi: 10.1101/gr.209247.116 (PMC5131822; doi:10.1101/gr.209247.116), 2016-12
Supplement: supp_gr.209247.116_Supplemental_Table_S9.pdf [file supp_gr.209247.116_Supplemental_Table_S9.pdf]

Supplemental Table S9. Assembly of human chromosomes 15 and 17 (sorted reads). Note that *k*-mer validation (L and specially LH) decreases the assembly errors (last three columns). The improvement in contiguity (NG50, largest contig) is more clearly seen in Supplemental Fig. S11.

| Assembly*      | Contig number | Largest contig | Total length | NG50    | Misassemblies > 1kb † | Mismatches/100kb | Indels/100kb |
|----------------|---------------|----------------|--------------|---------|-----------------------|------------------|--------------|
| human_chr15_M  | 343           | 7309895        | 83890337     | 1602477 | 78                    | 86.32            | 95.86        |
| human_chr15_L  | 330           | 8894105        | 83396444     | 2152643 | 73                    | 83.96            | 94.97        |
| human_chr15_LH | 322           | 9276182        | 83558937     | 1897981 | 77                    | 82.60            | 90.37        |
| human_chr17_M  | 414           | 5412440        | 83732343     | 2081827 | 182                   | 73.84            | 103.51       |
| human_chr17_L  | 388           | 6783205        | 82743477     | 1606756 | 190                   | 72.78            | 104.28       |
| human_chr17_LH | 361           | 8323604        | 82720089     | 2081188 | 152                   | 67.11            | 96.96        |

\* "M", standard MHAP; "L", MHAP with low-frequency *k*-mer masking; "LH", MHAP with low and high frequency *k*-mer masking.

† As reported by Quast (Gurevich et al. 2013): misassemblies > 1kb, or joining different chromosomes..
