# Supplementary material for: Improved assembly of noisy long reads by k-mer validation
Source: PubMed Central journal article supplement — Genome Res. 2016 Dec;26(12):1710–20. doi: 10.1101/gr.209247.116 (PMC5131822; doi:10.1101/gr.209247.116), 2016-12
Supplement: supp_gr.209247.116_Supplemental_Table_S10.pdf [file supp_gr.209247.116_Supplemental_Table_S10.pdf]

Supplemental Table S10. Assembly of the "model genome" (human 10q11 segmental duplication) with *k*-mer validation and hybrid assembly methods. Note that only LH *k*-mer validation produces a correct assembly with two contigs.

| Method* | Both contigs    |              |                   | Left contig (401 kb) |              |                   | Right contig (201 kb) |              |                   |
|---------|-----------------|--------------|-------------------|----------------------|--------------|-------------------|-----------------------|--------------|-------------------|
|         | % sequence lost | % duplicated | Number of contigs | % sequence lost      | % duplicated | Number of contigs | % sequence lost       | % duplicated | Number of contigs |
| M       | 6.3             | 19.2         | 11                | 4.2                  | 15.0         | 6                 | 10.6                  | 27.7         | 5                 |
| L       | 3.3             | 1.0          | 3                 | 2.5                  | 0            | 1                 | 4.9                   | 3.0          | 2                 |
| LH      | 3.7             | 0            | 2                 | 2.4                  | 0            | 1                 | 6.3                   | 0            | 1                 |
| Hybrid  | 4.5             | 17.5         | 12                | 3.5                  | 8.4          | 5                 | 6.5                   | 35.7         | 7                 |
| DCA     | 1.9             | 7.2          | 5                 | 1.5                  | 7.8          | 3                 | 2.7                   | 6.0          | 2                 |

\* "M", standard MHAP; "L", MHAP with low-frequency *k*-mer masking; "LH", MHAP with low and high frequency *k*-mer masking; "Hybrid", standard hybrid assembly (Illumina reads used to correct the PacBio reads, followed by direct assembly); "DCA", doubly corrected assembly (Illumina reads used to correct the PacBio reads, followed by self correction of the long reads, then followed by the assembly).
