# Supplementary material for: Improved assembly of noisy long reads by k-mer validation
Source: PubMed Central journal article supplement — Genome Res. 2016 Dec;26(12):1710–20. doi: 10.1101/gr.209247.116 (PMC5131822; doi:10.1101/gr.209247.116), 2016-12
Supplement: supp_gr.209247.116_Supplemental_Table_S11.pdf [file supp_gr.209247.116_Supplemental_Table_S11.pdf]

Supplemental Table S11. Assembly coverage of Y-linked and X-linked single-copy genes.

| Gene                        | Chrom. | CDS size | % assembled MHAP | % assembled LH |
|-----------------------------|--------|----------|------------------|----------------|
| <i>ARY</i>                  | Y      | 1,101    | 100.0            | 100.0          |
| <i>CCY</i>                  | Y      | 4,000    | 26.8             | 26.8           |
| <i>ORY</i>                  | Y      | 2,745    | 47.1             | 47.1           |
| <i>PRY</i>                  | Y      | 3,744    | 26.9             | 33.9           |
| <i>kl2</i>                  | Y      | 13,380   | 74.1             | 74.1           |
| <i>PPr-Y</i>                | Y      | 1,710    | 72.9             | 83.4           |
| <i>kl3</i>                  | Y      | 13,053   | 61.6             | 53.7           |
| <i>kl5</i>                  | Y      | 13,680   | 23.9             | 23.9           |
| <i>Pp1Y1</i>                | Y      | 921      | 100.0            | 100.0          |
| <i>WDY</i>                  | Y      | 2,975    | 100.0            | 100.0          |
| <i>Pp1Y2</i>                | Y      | 930      | 100.0            | 100.0          |
| Sum Y genes                 | Y      | 58,239   | 54.5             | 53.5           |
| <i>dusky</i>                | X      | 2,100    | 100.0            | 100.0          |
| <i>garnet</i>               | X      | 3,105    | 100.0            | 100.0          |
| <i>scalloped</i>            | X      | 1,323    | 100.0            | 100.0          |
| <i>singed</i>               | X      | 1,539    | 100.0            | 100.0          |
| <i>crossveinless</i>        | X      | 774      | 100.0            | 100.0          |
| <i>notch</i>                | X      | 8,112    | 100.0            | 100.0          |
| <i>lozenge</i>              | X      | 2,481    | 100.0            | 100.0          |
| <i>white</i>                | X      | 2,064    | 100.0            | 100.0          |
| <i>cut</i>                  | X      | 7,152    | 100.0            | 100.0          |
| <i>fused</i>                | X      | 2,418    | 100.0            | 100.0          |
| <i>ruby</i>                 | X      | 3,483    | 100.0            | 100.0          |
| <i>scute</i>                | X      | 1,038    | 100.0            | 100.0          |
| <i>vermillion</i>           | X      | 1,140    | 97.8             | 97.8           |
| <i>forked</i>               | X      | 5,757    | 100.0            | 100.0          |
| <i>miniature</i>            | X      | 2,049    | 100.0            | 100.0          |
| <i>yellow</i>               | X      | 1,626    | 100.0            | 100.0          |
| <i>echinus</i>              | X      | 5,298    | 100.0            | 100.0          |
| <i>Clathrin-heavy-chain</i> | X      | 5,037    | 100.0            | 100.0          |
| <i>carnation</i>            | X      | 1,854    | 100.0            | 100.0          |
| <i>tan</i>                  | X      | 1,164    | 100.0            | 100.0          |
| Sum X genes                 | X      | 59,514   | 100.0            | 100.0          |
