# Supplementary material for: Improved assembly of noisy long reads by k-mer validation
Source: PubMed Central journal article supplement — Genome Res. 2016 Dec;26(12):1710–20. doi: 10.1101/gr.209247.116 (PMC5131822; doi:10.1101/gr.209247.116), 2016-12
Supplement: supp_gr.209247.116_Supplemental_Table_S12.pdf [file supp_gr.209247.116_Supplemental_Table_S12.pdf]

Supplemental Table S12. Sources of PacBio and Illumina reads.

| Organism               | PacBio reads                                                                                                                                                    | Illumina reads                                                                                                                                                                                                                                                                                                           |
|------------------------|-----------------------------------------------------------------------------------------------------------------------------------------------------------------|--------------------------------------------------------------------------------------------------------------------------------------------------------------------------------------------------------------------------------------------------------------------------------------------------------------------------|
| <i>E. coli</i>         | Amazon Elastic Block Storage (EBS) snapshot*                                                                                                                    | <a href="http://www.illumina.com/systems/miseq/scientific_data.html">http://www.illumina.com/systems/miseq/scientific_data.html</a>                                                                                                                                                                                      |
| <i>S. cerevisiae</i>   | Amazon Elastic Block Storage (EBS) snapshot*                                                                                                                    | SRR1569900                                                                                                                                                                                                                                                                                                               |
| <i>C. elegans</i>      | <a href="http://datasets.pacb.com.s3.amazonaws.com/2014/c_elegans/list.html">http://datasets.pacb.com.s3.amazonaws.com/2014/c_elegans/list.html</a>             | SRP046600                                                                                                                                                                                                                                                                                                                |
| <i>A. thaliana</i>     | <a href="http://datasets.pacb.com.s3.amazonaws.com/2014/Arabidopsis/raw/list.html">http://datasets.pacb.com.s3.amazonaws.com/2014/Arabidopsis/raw/list.html</a> | <a href="http://1001genomes.org/data/MPI/MPISchneeberger2011/releases/current/Ler-1/Reads/ERR031543">http://1001genomes.org/data/MPI/MPISchneeberger2011/releases/current/Ler-1/Reads/ERR031543</a> , <a href="http://1001genomes.org/data/MPI/MPISchneeberger2011/releases/current/Ler-1/Reads/ERR031544">ERR031544</a> |
| <i>D. melanogaster</i> | Amazon Elastic Block Storage (EBS) snapshot*                                                                                                                    | ERX645969                                                                                                                                                                                                                                                                                                                |
| <i>H. sapiens</i>      | [prepared by an anonymous reviewer, using data described in (Zook et al. 2016)]                                                                                 | <a href="https://github.com/genome-in-a-bottle/giab_data_indexes/raw/master/AshkenazimTrio/sequence.index.AJtrio_Illumina300X_wgs_07292015">https://github.com/genome-in-a-bottle/giab_data_indexes/raw/master/AshkenazimTrio/sequence.index.AJtrio_Illumina300X_wgs_07292015</a>                                        |

\*See (Berlin et al. 2015)
