# Supplementary material for: Improved assembly of noisy long reads by k-mer validation
Source: PubMed Central journal article supplement — Genome Res. 2016 Dec;26(12):1710–20. doi: 10.1101/gr.209247.116 (PMC5131822; doi:10.1101/gr.209247.116), 2016-12
Supplement: supp_gr.209247.116_Supplemental_Table_S13.pdf [file supp_gr.209247.116_Supplemental_Table_S13.pdf]

Supplemental Table S13. Effect of the MHAP memory parameter (ovlMemory) in the assemblies.

| Assembly # | Organism           | Method * | Server † | ovlMemory (Gb) | Contig number | Largest contig | Total length | N50     |
|------------|--------------------|----------|----------|----------------|---------------|----------------|--------------|---------|
| 1          | <i>C. elegans</i>  | M        | UFSCAR   | 96             | 160           | 5285002        | 104521767    | 2119841 |
| 2          | <i>C. elegans</i>  | M        | UNESP    | 96             | 153           | 5285097        | 104406091    | 2119842 |
| 3          | <i>C. elegans</i>  | M        | UNESP    | 86             | 159           | 5320507        | 104403953    | 2121435 |
| 4          | <i>C. elegans</i>  | M        | UNESP    | 69             | 149           | 5390271        | 104224810    | 2344558 |
| 5          | <i>C. elegans</i>  | LH       | UNESP    | 96             | 108           | 7255917        | 103011910    | 2689324 |
| 6          | <i>C. elegans</i>  | LH       | UNESP    | 86             | 98            | 5611921        | 102755304    | 2344003 |
| 7          | <i>C. elegans</i>  | LH       | UNESP    | 69             | 103           | 7245259        | 102859975    | 2585760 |
| 8          | <i>Arabidopsis</i> | M        | UFRJ     | 56             | 605           | 16102301 ‡     | 132736962    | 9130071 |
| 9          | <i>Arabidopsis</i> | M        | UFSCAR   | 56             | 605           | 16102203 ‡     | 132736662    | 9130072 |
| 10         | <i>Arabidopsis</i> | M        | UNESP    | 56             | 604           | 16137445 ‡     | 132723470    | 9130069 |
| 11         | <i>Arabidopsis</i> | M        | UNESP    | 96             | 727           | 15819010       | 134467725    | 9063252 |
| 12         | <i>Arabidopsis</i> | M        | UFSCAR   | 96             | 727           | 15819004       | 134469351    | 9063257 |

\* "M", standard MHAP; "LH", MHAP with low and high frequency *k*-mer masking.

† UFSCAR: 24 cores and 128 Gb RAM; UNESP: 144 cores and 1Tb RAM; UFRJ: 24 cores and 64 Gb RAM.

‡ Contains a gross misassembly: a quimeric contig containing sequences from chromosomes 3 and 5 (Supplemental Fig. S7; Supplemental Results).
